# Supplementary material
Source: PubMed Central journal article supplement (PMC5193328)
Supplement: supp_dew265_dew265supp_table1.pdf [file supp_dew265_dew265supp_table1.pdf]

**Supplementary Table S1** Demographic characteristics for the total sample of Canadian men, aged 18–50 years.

| Demographic characteristics                        | Originally collected data |      | National data <sup>a</sup> |
|----------------------------------------------------|---------------------------|------|----------------------------|
|                                                    | N                         | %    | %                          |
| Age of respondent (years)                          |                           |      |                            |
| Under 30                                           | 262                       | 37.4 | 37.7                       |
| 30–39                                              | 237                       | 33.8 | 28.4                       |
| 40–50                                              | 202                       | 28.8 | 33.9                       |
| Region of residence                                |                           |      |                            |
| British Columbia                                   | 82                        | 11.7 | 13.1 <sup>b</sup>          |
| Prairie provinces                                  | 136                       | 19.4 | 18.5                       |
| Ontario                                            | 261                       | 37.2 | 39.2                       |
| Quebec                                             | 169                       | 24.1 | 23.1                       |
| Atlantic provinces                                 | 53                        | 7.6  | 6.3                        |
| Ethnicity                                          |                           |      |                            |
| Visible minority                                   | 270                       | 38.5 | 20.0                       |
| Not a visible minority (white)                     | 431                       | 61.5 | 80.0                       |
| Immigrant status                                   |                           |      |                            |
| Immigrant (born outside of Canada)                 | 188                       | 26.8 | 23.7 <sup>b</sup>          |
| Not an immigrant (born in Canada)                  | 513                       | 73.2 | 76.3                       |
| Second generation (parents born outside of Canada) | 179                       | 25.5 | —                          |
| Third generation (parents born in Canada) or other | 334                       | 47.7 | —                          |
| Education                                          |                           |      |                            |
| Less than a high school degree                     | 38                        | 5.4  | 10.3                       |
| High school graduate                               | 210                       | 30.0 | 34.4                       |
| College/university graduate                        | 453                       | 64.6 | 55.3                       |
| Employment status                                  |                           |      |                            |
| Unemployed                                         | 99                        | 14.1 | —                          |
| Not unemployed                                     | 602                       | 85.9 | —                          |
| Full-time employed                                 | 418                       | 59.6 | —                          |
| Part-time employed                                 | 88                        | 12.6 | —                          |
| Full-time student or other                         | 96                        | 13.7 | —                          |
| Income                                             |                           |      |                            |
| <\$40,000                                          | 204                       | 29.1 | 45.4                       |
| \$40,000–\$79,999                                  | 254                       | 36.2 | 34.4                       |
| ≥\$80,000                                          | 243                       | 34.7 | 20.3                       |
| Sexual orientation                                 |                           |      |                            |
| Heterosexual                                       | 647                       | 92.3 | —                          |
| Not heterosexual (homosexual/bisexual)             | 54                        | 7.7  | —                          |
| Marital status                                     |                           |      |                            |
| Partner lives in household                         | 343                       | 48.9 | 60.7                       |
| Married                                            | 269                       | 38.4 | 45.3                       |
| Common-law relationship                            | 74                        | 10.6 | 15.5                       |
| No partner lives in household                      | 358                       | 51.1 | 39.3                       |

Continued

**Supplementary Table S1** *Continued*

| Demographic characteristics                | Originally collected data |       | National data <sup>a</sup> |
|--------------------------------------------|---------------------------|-------|----------------------------|
|                                            | N                         | %     | %                          |
| Fathered children                          |                           |       |                            |
| At least one biological child              | 280                       | 39.9  | 41.6 <sup>b</sup>          |
| No biological children                     | 421                       | 60.1  | 58.4                       |
| Future children                            |                           |       |                            |
| Wants to have biological children          | 328                       | 46.8  | —                          |
| Does not want to have biological children  | 189                       | 27.0  | —                          |
| Undecided about having biological children | 184                       | 26.3  | —                          |
| Total sample                               | 701                       | 100.0 | 100.0                      |

<sup>a</sup>All variables, except the age of respondent, were calculated using a weighted sample of Canadian men, aged 18–50 years, from the 2011 General Social Survey of Canada; age of respondent was calculated using CANSIM 51-0001, 2015 estimates of population, by age group and sex.

<sup>b</sup>Indicates that there were no significant differences by running a chi-square goodness of fit test.
