# Supplementary material
Source: PubMed Central journal article supplement (PMC5193328)
Supplement: supp_dew265_dew265supp_table2.pdf [file supp_dew265_dew265supp_table2.pdf]

## Supplementary Table SII Full survey questionnaire.

### Men's fertility awareness: general population needs assessment survey

#### Section I: Screening and introduction

- Q1. Please indicate your sex.
- 01 Male
  - 02 Female
  - 03 Other
- Q2. Do you work or does someone in your immediate household work for a market research company?
- 01 Yes
  - 02 No
- Q3. Which of the following represents your age?
- 01 17 years or younger
  - 02 18–20 years
  - 03 21–25 years
  - 04 26–30 years
  - 05 31–35 years
  - 06 36–40 years
  - 07 41–45 years
  - 08 46–50 years
  - 09 51 years or older

#### Section II: Demographic characteristics

- Q4. Which group best represents your ethnic origin?
- 01 Aboriginal (e.g. First Nations, Inuit, or Métis)
  - 02 Arab
  - 03 Black
  - 04 Chinese
  - 05 Filipino
  - 06 Japanese
  - 07 Korean
  - 08 Latin American
  - 09 South Asian (e.g. Indian, Pakistani, Bangladeshi, Sri Lankan)
  - 10 Southeast Asian (e.g. Cambodian, Indonesian, Laotian, Vietnamese)
  - 11 West Asian (e.g. Afghan, Iranian)
  - 12 White
  - 88 Some other group (please specify):
- Q5a. Do you consider yourself a:
- 01 First generation immigrant—born outside of Canada
  - 02 Second generation immigrant—you were born here but at least parent was born outside of Canada
  - 03 Third generation Canadian and beyond—both you and your parents were born in Canada
  - 88 Other
- Q5b. How long have you lived in Canada? [If Q5a = 01]
- Number of years
- Q6. Please indicate your current employment status:
- 01 Full-time employed
  - 02 Part-time employed
  - 03 Full-time student
  - 04 Unemployed due to illness or disability
  - 05 Unemployed due to other reasons
  - 06 Homemaker
  - 88 Other

Continued

**Supplementary Table SII** *Continued*

**Men's fertility awareness: general population needs assessment survey**

- Q7. Which of the following best describes the area in which you live?
- 01 Urban
  - 02 Suburban
  - 03 Rural
- Q8. Please select the income bracket that best describes your annual household income for 2014.
- 01 <\$20,000
  - 02 \$20,000–\$39,999
  - 03 \$40,000–\$59,999
  - 04 \$60,000–\$79,999
  - 05 \$80,000–\$99,999
  - 06 \$100,000–\$119,999
  - 07 ≥\$120,000
- Q9. In which province do you currently reside?
- 01 British Columbia
  - 02 Alberta
  - 03 Saskatchewan
  - 04 Manitoba
  - 05 Ontario
  - 06 Quebec
  - 07 New Brunswick
  - 08 Newfoundland
  - 09 Nova Scotia
  - 10 Prince Edward Island
  - 11 North (Northwest Territories, Nunavut, Yukon)
- Q10. What is the highest level of education you have completed or the highest degree you have received?
- 01 Less than high school
  - 02 Completed some high school
  - 03 High school graduate or equivalent
  - 04 Technical college, community college, or CEGEP
  - 05 Completed some university, but no degree
  - 06 University graduate
  - 07 Completed some post-graduate school, but no degree
  - 08 Completed post-graduate school (e.g. MS, MD, or PhD)
- Q11. Do you consider yourself to be...?
- 01 Heterosexual, that is straight (sexual relations with people of the opposite sex)
  - 02 Homosexual, that is gay (sexual relations with people of your own sex)
  - 03 Bisexual (sexual relations with people of both sexes)
- Q12. Which of the following best describes your marital status?
- 01 Single
  - 02 Married
  - 03 Living with a common-law spouse
  - 04 Separated
  - 05 Divorced
  - 06 Widowed
  - 07 Long-term dating

*Continued*

**Supplementary Table SII** *Continued*

**Men's fertility awareness: general population needs assessment survey**

Q13. Have you fathered any biological children?

01 Yes

02 No

Q14a. In the future, would you like to have more biological children? [If Q13 = 01]

01 Yes

02 No

03 Undecided

Q14b. In the future, would you like to have biological children? [If Q13 = 02]

01 Yes

02 No

03 Undecided

*Section III: Fertility characteristics and experiences*

Q15. In general, how knowledgeable would you say you are about.?

(a) Male reproduction

(b) Female reproduction

01 Not at all knowledgeable

02 Slightly knowledgeable

03 Somewhat knowledgeable

04 Very knowledgeable

05 Extremely knowledgeable

Q16. To the best of your knowledge, to what extent do male and female factors contribute to fertility problems?

(a) Male factors

(b) Female factors

01 Does not at all cause fertility problems

02

03 Somewhat causes fertility problems

04

05 Major cause of fertility problems

Q17. How concerned are you about your own fertility at this time?

01 Not at all concerned

02 Slightly concerned

03 Somewhat concerned

04 Very concerned

05 Extremely concerned

Q18. Have you, or a partner, ever been assessed for fertility problems? (Please select all that apply.)

01 Yes, myself

02 Yes, a partner

03 Neither<sup>b</sup>

Q19. Have you ever had any experience with treatment for fertility problems? This can be either personally, through a partner, or someone you know. (Please select all that apply.)

01 Yes, myself

02 Yes, a partner

03 Yes, someone I know

04 No experience<sup>b</sup>

Q20a. Have you ever undergone any treatment for other medical conditions/illnesses that you were told would affect your fertility?

01 Yes

02 No

*Continued*

## Supplementary Table SII *Continued*

### Men's fertility awareness: general population needs assessment survey

Q20b. Please specify which treatment(s)? [If Q20a = 01]

- 01 Open-ended text box
- 02 Open-ended text box
- 03 Open-ended text box
- 04 Open-ended text box
- 05 Open-ended text box

#### Section IV: Fertility knowledge

Q21. Are you aware of any factors that can affect a man's fertility? If so, please type them in the boxes below.

- 01 Open-ended text box
- 02 Open-ended text box
- 03 Open-ended text box
- 04 Open-ended text box
- 05 Open-ended text box
- 06 Open-ended text box
- 07 Open-ended text box
- 08 Open-ended text box
- 09 Open-ended text box
- 10 Open-ended text box
- 11 Open-ended text box
- 12 Open-ended text box
- 13 Open-ended text box
- 14 Open-ended text box
- 15 Open-ended text box

98 Not aware of any factors that can affect a man's fertility<sup>b</sup>

Q22. Regardless of your answers in the previous question, please rate the extent to which you consider each of the following to be a factor that affects a man's fertility.

- (a) Age (more than 45 years old)
- (b) Alcohol consumption (more than 10 drinks a week)
- (c) Belonging to a specific ethnic group<sup>a</sup>
- (d) Cancer treatment (such as radiation or chemotherapy)
- (e) Coffee (>4 cups a day)<sup>a</sup>
- (f) Delayed puberty
- (g) Dental cavity fillings<sup>a</sup>
- (h) Diabetes
- (i) Exposure to pesticides or environmental toxins (paint, solvents, etc.)
- (j) Frequent bicycling or riding horses
- (k) Frequent hot tub use
- (l) Frequent masturbation<sup>a</sup>
- (m) Frequent sexual relations<sup>a</sup>
- (n) Frequent use of a laptop on your lap
- (o) Genetic abnormality
- (p) Hernia repair
- (q) High cholesterol
- (r) Lack of regular exercise<sup>a</sup>
- (s) Long-term use of antibiotics<sup>a</sup>
- (t) Long-term use of steroids
- (u) Migraines<sup>a</sup>

*Continued*

**Supplementary Table SII** *Continued*

**Men's fertility awareness: general population needs assessment survey**

- (v) Overuse of electronic devices (such as cellphones or computers)
- (w) Overweight/obesity
- (x) Pain or injury to the testicles or scrotum
- (y) Poor diet<sup>a</sup>
- (z) Sexually transmitted infections (such as chlamydia, gonorrhoea, etc.)
- (aa) Size of testicles
- (ab) Smoking cigarettes
- (ac) Stress
- (ad) Urinary tract (bladder) infection
- (ae) Use of drugs (such as marijuana, narcotics, cocaine)
- (af) Wearing tight pants
- (ag) Work-out supplements (such as creatine, protein, etc.)<sup>a</sup>
- (ah) X-rays
  - 01 Definitely not a factor
  - 02 Probably not a factor
  - 03 Uncertain
  - 04 Probably a factor
  - 05 Definitely a factor

Q23. Are you aware of any medical conditions/illnesses that men with fertility problems may be at risk of? If so, please type them in the boxes below.

- 01 Open-ended text box
- 02 Open-ended text box
- 03 Open-ended text box
- 04 Open-ended text box
- 05 Open-ended text box
- 06 Open-ended text box
- 07 Open-ended text box
- 08 Open-ended text box
- 09 Open-ended text box
- 10 Open-ended text box
- 11 Open-ended text box
- 12 Open-ended text box
- 13 Open-ended text box
- 14 Open-ended text box
- 15 Open-ended text box

98 Not aware of any medical conditions/illnesses<sup>b</sup>

Q24. Regardless of your answers in the previous question, please rate the extent to which you consider men with fertility problems to be at risk of each of the following medical conditions/illnesses.

- (a) Arthritis<sup>a</sup>
- (b) Being underweight<sup>a</sup>
- (c) Cardiovascular disease (heart disease, high blood pressure)
- (d) Depression
- (e) Diabetes
- (f) Fever<sup>a</sup>
- (g) Insomnia<sup>a</sup>
- (h) Obesity
- (i) Prostate cancer
- (j) Sexually transmitted infections

*Continued*

**Supplementary Table SII** *Continued*

**Men's fertility awareness: general population needs assessment survey**

- (k) Testicular cancer
  - 01 Definitely not at risk of
  - 02 Probably at risk of
  - 03 Uncertain
  - 04 Probably at risk of
  - 05 Definitely at risk of

Q25. Please indicate whether or not you are aware of each of the following treatment options available to men who experience fertility problems so they may be able to father biological children.

- (a) Acupuncture
- (b) Antibiotics
- (c) Banking sperm
- (d) Gonadotropin treatment
- (e) Herbal remedies (such as ginseng, etc.)
- (f) IVF
- (g) ICSI
- (h) IUI
- (i) Testicular sperm extraction (TESE)
- (j) Treatment for erectile dysfunction
- (k) Varicocele repair
- (l) Vasectomy reversal
- (m) Vitamins and supplements
  - 01 Aware
  - 02 Not aware

*Section V: Sources of information and the use of technology*

Q26. From which sources have you gained knowledge about men's fertility?

- 01 Books
- 02 Doctor
- 03 Friends/family
- 04 Healthcare professional other than a doctor or nurse
- 05 Internet—medical websites
- 06 Internet—non-medical websites
- 07 Magazines
- 08 Medical apps on smartphones or tablets
- 09 Newspapers
- 10 Nurses
- 11 Online blogs
- 12 Online news sites
- 13 Pamphlets
- 14 Radio
- 15 School/university
- 16 TV
- 88 Other (please specify):
- 89 Other (please specify):
- 98 Have not looked for information on men's fertility<sup>b</sup>

*Continued*

**Supplementary Table SII** *Continued*

**Men's fertility awareness: general population needs assessment survey**

- Q27a. To what extent are you interested in learning more about male reproduction and fertility problems, including the risk factors and other medical conditions/illnesses associated with it and treatment for it?
- 01 Not at all interested
  - 02 Not very interested
  - 03 Somewhat interested
  - 04 Very interested
  - 05 Extremely interested
- Q27b. If you had the choice, how would you like to receive information on men's fertility? (Please select all that apply.) [If Q27a = 03, 04, 05]
- 01 An app on your phone or tablet
  - 02 Dedicated website
  - 03 From your doctor
  - 04 From a healthcare professional other than your doctor
  - 05 Newspapers or magazines
  - 06 Pamphlets in the mail
  - 07 Phone hotline where you could speak with a medical professional
  - 08 Radio
  - 09 TV
  - 88 Other (please specify):
  - 89 Other (please specify):
- Q28. Which of the following devices do you currently own? (Please select all that apply.)
- 01 Desktop computer
  - 02 Laptop computer
  - 03 Smartphone
  - 04 Tablet
  - 98 None of the above<sup>b</sup>

<sup>a</sup>Indicates that the response was a decoy item.

<sup>b</sup>When the indicated response was selected, then no other responses could be selected.

Data collected between 20 April and 29 May 2015.
