# Supplementary material
Source: PubMed Central journal article supplement (PMC5193328)
Supplement: supp_dew265_dew265supp_table3.pdf [file supp_dew265_dew265supp_table3.pdf]

**Supplementary Table SIII Overview of covariates and how each was recoded.**

| Variable          | Original survey question                                                                                                                                                                                                                                                                                                                                                                                                                                | Recoded covariate                                                                                                                                                                                           |
|-------------------|---------------------------------------------------------------------------------------------------------------------------------------------------------------------------------------------------------------------------------------------------------------------------------------------------------------------------------------------------------------------------------------------------------------------------------------------------------|-------------------------------------------------------------------------------------------------------------------------------------------------------------------------------------------------------------|
| Age of respondent | Which of the following represents your age? (Q3)<br>01: 17 years or younger<br>02: 18–20 years<br>03: 21–25 years<br>04: 26–30 years<br>05: 31–35 years<br>06: 36–40 years<br>07: 41–45 years<br>08: 46–50 years<br>09: 51 years or older                                                                                                                                                                                                               | Age of respondent:<br>01: <30 [Originally coded = 02, 03, 04]<br>02: 30–39 [Originally coded = 05, 06]<br>03: 40–50 [Originally coded = 07, 08]                                                             |
| Ethnicity         | Which group best represents your ethnic origin? (Q4)<br>01: Aboriginal<br>02: Arab<br>03: Black<br>04: Chinese<br>05: Filipino<br>06: Japanese<br>07: Korean<br>08: Latin American<br>09: South Asian<br>10: Southeast Asian<br>11: West Asian<br>12: White<br>88: Some other group                                                                                                                                                                     | Ethnicity:<br>01: Visible minority [Originally coded = 01, 02, 03, 04, 05, 06, 07, 08, 09, 10, 11, 88]<br>02: Not a visible minority (white) [Originally coded = 12, 88]                                    |
| Immigrant status  | Do you consider yourself a: (Q5a)<br>01: First generation, born outside of Canada<br>02: Second generation, parent(s) born outside of Canada<br>03: Third generation and beyond<br>88: Other                                                                                                                                                                                                                                                            | Immigrant status:<br>01: Immigrant (born outside of Canada) [Originally coded = 01]<br>02: Not an immigrant (born in Canada) [Originally coded = 02, 03, 88]                                                |
| Education         | What is the highest level of education you have completed or the highest degree you have received? (Q10)<br>01: Less than high school<br>02: Completed some high school<br>03: High school graduate or equivalent<br>04: Technical college, community college, or CEGEP<br>05: Completed some university, but no degree<br>06: University graduate<br>07: Completed some post-graduate school, but no degree<br>08: Completed some post-graduate school | Education:<br>01: Less than a high school degree [Originally coded = 01, 02]<br>02: High school graduate [Originally coded = 03, 05]<br>03: College/university graduate [Originally coded = 04, 06, 07, 08] |
| Employment status | Please indicate your current employment status: (Q6)<br>01: Full-time employed<br>02: Part-time employed<br>03: Full-time student<br>04: Unemployed due to illness or disability<br>05: Unemployed due to other reasons<br>06: Homemaker<br>88: Other                                                                                                                                                                                                   | Employment status:<br>01: Unemployed [Originally coded = 04, 05]<br>02: Not unemployed [Originally coded = 01, 02, 03, 06, 88]                                                                              |

Continued

**Supplementary Table SIII** *Continued*

| Variable                                                  | Original survey question                                                                                                                                                                                                                                           | Recoded covariate                                                                                                                                                                                                           |
|-----------------------------------------------------------|--------------------------------------------------------------------------------------------------------------------------------------------------------------------------------------------------------------------------------------------------------------------|-----------------------------------------------------------------------------------------------------------------------------------------------------------------------------------------------------------------------------|
| Income                                                    | Please select the income bracket that best describes your annual household income for 2014. (Q8)<br>01: <\$20,000<br>02: \$20,000–\$39,999<br>03: \$40,000–\$59,999<br>04: \$60,000–\$79,999<br>05: \$80,000–\$99,999<br>06: \$100,000–\$119,999<br>07: ≥\$120,000 | Income:<br>01: <\$40,000 [Originally coded = 01, 02]<br>02: \$40,000–\$79,999 [Originally coded = 03, 04]<br>03: ≥\$80,000 [Originally coded = 05, 06, 07]                                                                  |
| Sexual orientation                                        | Do you consider yourself to be..? (Q11)<br>01: Heterosexual, that is straight<br>02: Homosexual, that is gay<br>03: Bisexual                                                                                                                                       | Sexual orientation:<br>01: Heterosexual [Originally coded = 01]<br>02: Not heterosexual (homosexual/bisexual) [Originally coded = 02, 03]                                                                                   |
| Marital status                                            | Which of the following best describes your marital status? (Q12)<br>01: Single<br>02: Married<br>03: Living with a common-law spouse<br>04: Separated<br>05: Divorced<br>06: Widowed<br>07: Long-term dating                                                       | Marital status:<br>01: Partner lives in household (married/common-law) [Originally coded = 02, 03]<br>02: No partner lives in household [Originally coded = 01, 04, 05, 06, 07]                                             |
| Fathered children                                         | Have you fathered any biological children? (Q13)<br>01: Yes<br>02: No                                                                                                                                                                                              | Fathered children [Not recoded]<br>01: At least one biological child<br>02: No biological children.                                                                                                                         |
| Future children                                           | In the future, would you like to have (more) biological children? (Q14a, Q14b)<br>01: Yes<br>02: No<br>03: Undecided                                                                                                                                               | Future children: [Not recoded; variables combined]<br><br>01: Wants to have biological children<br>02: Does not want to have biological children<br>03: Undecided about having biological children                          |
| Self-reported knowledge                                   | In general, how knowledgeable would you say you are about male reproduction? (Q15a)<br>01: Not at all knowledgeable<br>02: Slightly knowledgeable<br>03: Somewhat knowledgeable<br>04: Very knowledgeable<br>05: Extremely knowledgeable                           | Self-reported knowledge:<br><br>01: Very knowledgeable [Originally coded = 04, 05]<br>02: Somewhat knowledgeable [Originally coded = 03]<br>03: Not very knowledgeable [Originally coded = 01, 02]                          |
| Awareness that male factors can contribute to infertility | To the best of your knowledge, to what extent do male factors contribute to fertility problems? (Q16a)<br>01: Does not at all cause fertility problems<br>02:<br>03: Somewhat causes fertility problems<br>04:<br>05: Major cause of fertility problems            | Awareness that male factors can contribute to infertility:<br>01: Male factors can cause fertility problems [Originally coded = 03, 04, 05]<br>02: Male factors do not cause fertility problems [Originally coded = 01, 02] |
| Fertility concerns                                        | How concerned are you about your own fertility at this time? (Q17)<br>01: Not at all concerned<br>02: Slightly concerned<br>03: Somewhat concerned<br>04: Very concerned<br>05: Extremely concerned                                                                | Fertility concerns:<br>01: Very concerned [Originally coded = 04, 05]<br>02: Somewhat concerned [Originally coded = 03]<br>03: Not very concerned [Originally coded = 01, 02]                                               |

*Continued*

**Supplementary Table SIII** *Continued*

| <b>Variable</b>                                           | <b>Original survey question</b>                                                                                                                                                                                                                                                                                                                            | <b>Recoded covariate</b>                                                                                                                                                                                                |
|-----------------------------------------------------------|------------------------------------------------------------------------------------------------------------------------------------------------------------------------------------------------------------------------------------------------------------------------------------------------------------------------------------------------------------|-------------------------------------------------------------------------------------------------------------------------------------------------------------------------------------------------------------------------|
| Experience with fertility assessment                      | Have you, or a partner, ever been assessed for fertility problems? (Q18)<br>01: Yes, myself<br>02: Yes, a partner<br>03: Neither                                                                                                                                                                                                                           | Experience with fertility assessment:<br>01: Respondent and/or partner has had experience with fertility assessment [Originally coded = 01, 02]<br>02: No experience with fertility assessment [Originally coded = 03]  |
| Experience with fertility treatment                       | Have you ever had any experience with treatment for fertility problems? This can be either personally, through a partner, or someone you know. (Q19)<br>01: Yes, myself<br>02: Yes, a partner<br>03: Yes, someone I know<br>04: No experience                                                                                                              | Experience with fertility treatment:<br>01: Respondent and/or partner has had experience with fertility treatment [Originally coded = 01, 02]<br>02: No experience with fertility treatment [Originally coded = 03, 04] |
| Interested in learning more about fertility in the future | To what extent are you interested in learning more about male reproduction and fertility problems, including the risk factors and other medical conditions/illnesses associated with it and treatment for it? (Q27a)<br>01: Not at all interested<br>02: Not very interested<br>03: Somewhat interested<br>04: Very interested<br>05: Extremely interested | Interested in learning more about fertility in the future:<br>01: Very interested [Originally coded = 04, 05]<br>02: Somewhat interested [Originally coded = 03]<br>03: Not very interested [Originally coded = 01, 02] |
